# Supplementary material for: Stearoyl-CoA Desaturase Is Essential for Porcine Adipocyte Differentiation
Source: PubMed Central journal article supplement (PMC7177282; doi:10.3390/ijms21072446), 2020-04-01
Supplement: ijms-21-02446-s001.pdf [file ijms-21-02446-s001.pdf]

Supporting information

Supplemental Figure S1

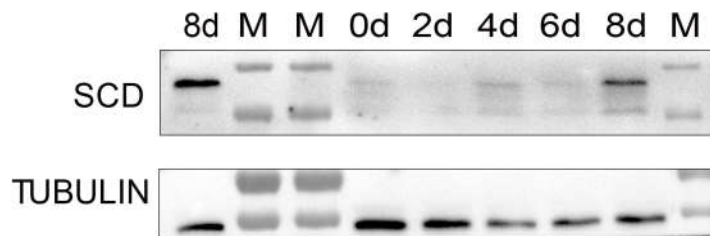

**Supplemental Figure S1.** The expression of SCD in cells by differentiation day. Western blot analysis results showing that the expression of SCD at differentiation day 8 was higher than it was on differentiation day 0, day 2, day 4 or day 6. The protein marker was named M.

Supplemental Figure S2

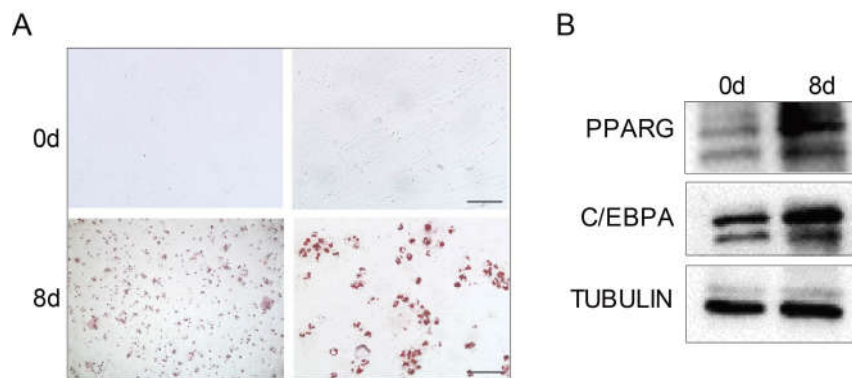

**Supplemental Figure S2. Porcine embryonic fibroblasts were differentiated into mature adipocytes.** The differentiation method was performed according to a previously described method. (A) Oil red O staining of differentiated day 0 and day 8 porcine embryonic fibroblasts. Red-colored droplets represent mature lipid droplets. Scale bar, 100  $\mu$ m. (B) The protein levels of the adipogenesis marker genes, PPARG and C/EBPA, were upregulated in differentiated cells.

Supplemental Table S1. Primers used in this study

| Gene Name     | Forward (5' - 3')         | Reverse (5' - 3')           |
|---------------|---------------------------|-----------------------------|
| <i>ACACA</i>  | TCAGAAGGAGGAGGAGGG<br>AA  | ATGACGGGACTGTTTGGCT<br>A    |
| <i>C/EBPA</i> | GGCCAGCACACACACATTA<br>GA | CCCCCAAAGAAGAGAACC<br>AAG   |
| <i>CPT1A</i>  | ACCAACCCCAACATTCCAT<br>A  | CCCTTTACCGAAAGTGGTG<br>A    |
| <i>CPT2</i>   | ACCTGGACCCTGCATACAA<br>G  | CACACACTGGAGAACTC<br>GC     |
| <i>DGAT1</i>  | CCCACCATCCAGAACTCCA<br>T  | CGGTCTCCAAACTGCATGA<br>G    |
| <i>DGAT2</i>  | CCCTCATAGCTGCCTACTC<br>C  | GAGGAAAGACAGGACCCA<br>CT    |
| <i>ELVOL6</i> | CCGGAAGTTTGCCATGTTC<br>A  | GCAGAAGAGCACAAGGTA<br>GC    |
| <i>FADS2</i>  | GGAACCACATCGTCCACA<br>AG  | CTTCTTGCCGTACTIONCAACC<br>G |
| <i>FABP4</i>  | AAGAAGTGGGAGTGGGCT<br>TT  | TTCCTGGCCCAATTTGAAG<br>G    |
| <i>FASN</i>   | CTGATCAAGGTGCTGCTGT<br>C  | CGAAGGAGTTTATGCCAC<br>G     |

|                     |                     |                     |
|---------------------|---------------------|---------------------|
| <i>GAPDH</i>        | GTCGGAGTGAACGGATTG  | AGTGGAGGTCAATGAAGG  |
|                     | G                   | GG                  |
| <i>PPARG</i>        | CCAGCATTCCACTCCACA  | GACACAGGCTCCACTTTGA |
|                     | CTA                 | TG                  |
| <i>SCD</i>          | CTTCCTGATCATTGCCAAC | GCAAACCACCCTTCTCTTT |
|                     | A                   | G                   |
| <i>SCD #9</i>       | AGAAGACATCCGCCCTGA  | TCTTGCAGGTGGGGATCAA |
|                     | AA                  | T                   |
| <i>SCDKO-GT-lar</i> | CACTGCCAGCTCTAGCCTT | GGCTCCACTATCAGCCCAA |
| <i>ge</i>           | T                   | G                   |
| <i>SREBP1-1C</i>    | TTTCTGACCCGCTTCTCCT | ACGGAACAACGAGTCAC   |
|                     |                     | CT                  |
| <i>VLCAD</i>        | GCCCATCAGAGCATTGGTT | TAGACAGAACGCAGCCAT  |
|                     | T                   | GA                  |

---
